# Supplementary material for: Ginsenoside Rg1 Alleviates Acute Ulcerative Colitis by Modulating Gut Microbiota and Microbial Tryptophan Metabolism
Source: Front Immunol. 2022 May 17;13:817600. doi: 10.3389/fimmu.2022.817600 (PMC9152015; doi:10.3389/fimmu.2022.817600)
Supplement: Supplementary file 1 [file DataSheet_1.docx]

**Ginsenoside Rg1 alleviates ulcerative colitis by modulating gut microbiota and microbial tryptophan metabolism**

**Hao Cheng1#, Juan Liu1#, Dandan Zhang1, Jing Wang1, Yuzhu Tan1,2, Wuwen Feng1,2*, Cheng Peng1,2***

1State Key Laboratory of Southwestern Chinese Medicine Resources, School of Pharmacy, Chengdu University of Traditional Chinese Medicine, Chengdu, China

2The Ministry of Education Key Laboratory of Standardization of Chinese Herbal Medicine, School of Pharmacy, Chengdu University of Traditional Chinese Medicine, Chengdu, China

#These authors have the equal contribution to this work.

*** Correspondence:**Wu-wen Feng, email: jiaoxiake-1@foxmail.com; Cheng Peng, email: pengchengcxy@126.co

**TABLE 1S** | Standard curves and other relevant information of tryptophan and its derivatives

| Substance name | Keep time | Linear equation | Correlation coefficient | Quantitative range | Limit of quantitation |
| --- | --- | --- | --- | --- | --- |
| Indole-3-carboxaldehyde (IAld) | 8.84 | y=0.795x+0.109 | 0.9929 | 0.0244-25 | 0.0244 |
| 3-Indolepropionic acid (IPA) | 10.12 | y=0.376x+0.0206 | 0.9994 | 0.195-50 | 0.195 |
| Indole-3-lactic acid (ILA) | 8.50 | y=0.0331x-0.0163 | 0.9966 | 0.488-250 | 0.488 |
| Nicotinamide (Nam) | 3.16 | y=0.203x+0.0203 | 0.9981 | 0.122-125 | 0.122 |
| L-Tryptophan (Trp) | 5.43 | y=0.227x+0.0319 | 0.9908 | 0.122-250 | 0.122 |

**TABLE 2S** | Ion pair information for mass spectrometric detection of tryptophan and its derivatives

| Compounds | Q1 | Q3 | DP | EP | CE | CXP |
| --- | --- | --- | --- | --- | --- | --- |
| Indole-3-carboxaldehyde (IAld) | 146.120 | 117.900 | 71 | 10 | 21 | 10 |
| 3-Indolepropionic acid (IPA) | 189.993 | 130.100 | 66 | 10 | 19 | 12 |
| Indole-3-lactic acid (ILA) | 206.081 | 118.000 | 71 | 10 | 31 | 10 |
| Nicotinamide (Nam) | 123.057 | 80.000 | 76 | 10 | 29 | 6 |
| *L*-Tryptophan (Trp) | 205.037 | 187.900 | 41 | 10 | 15 | 18 |


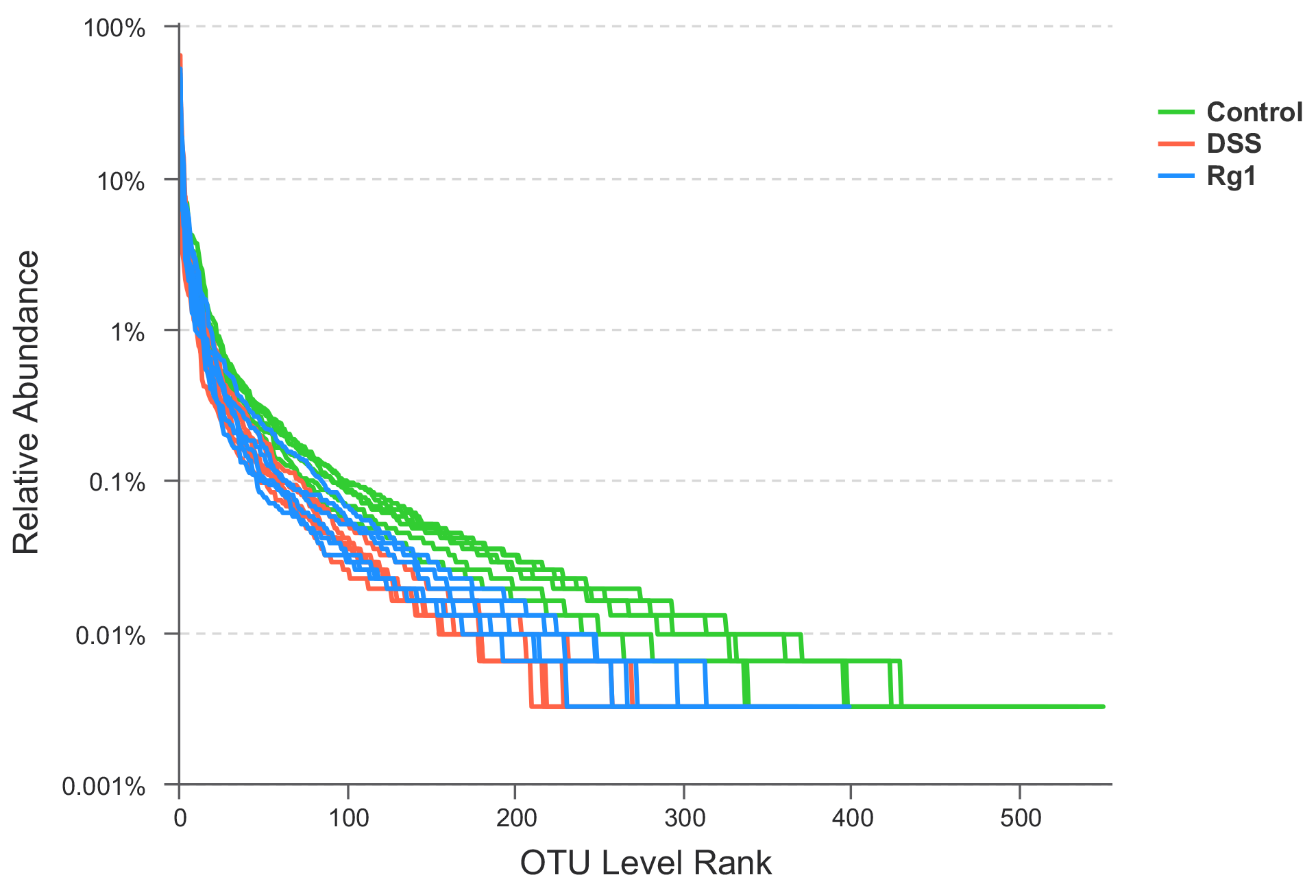


**FIGURE 1S** | The OTU dilution curve of gut microbiota.


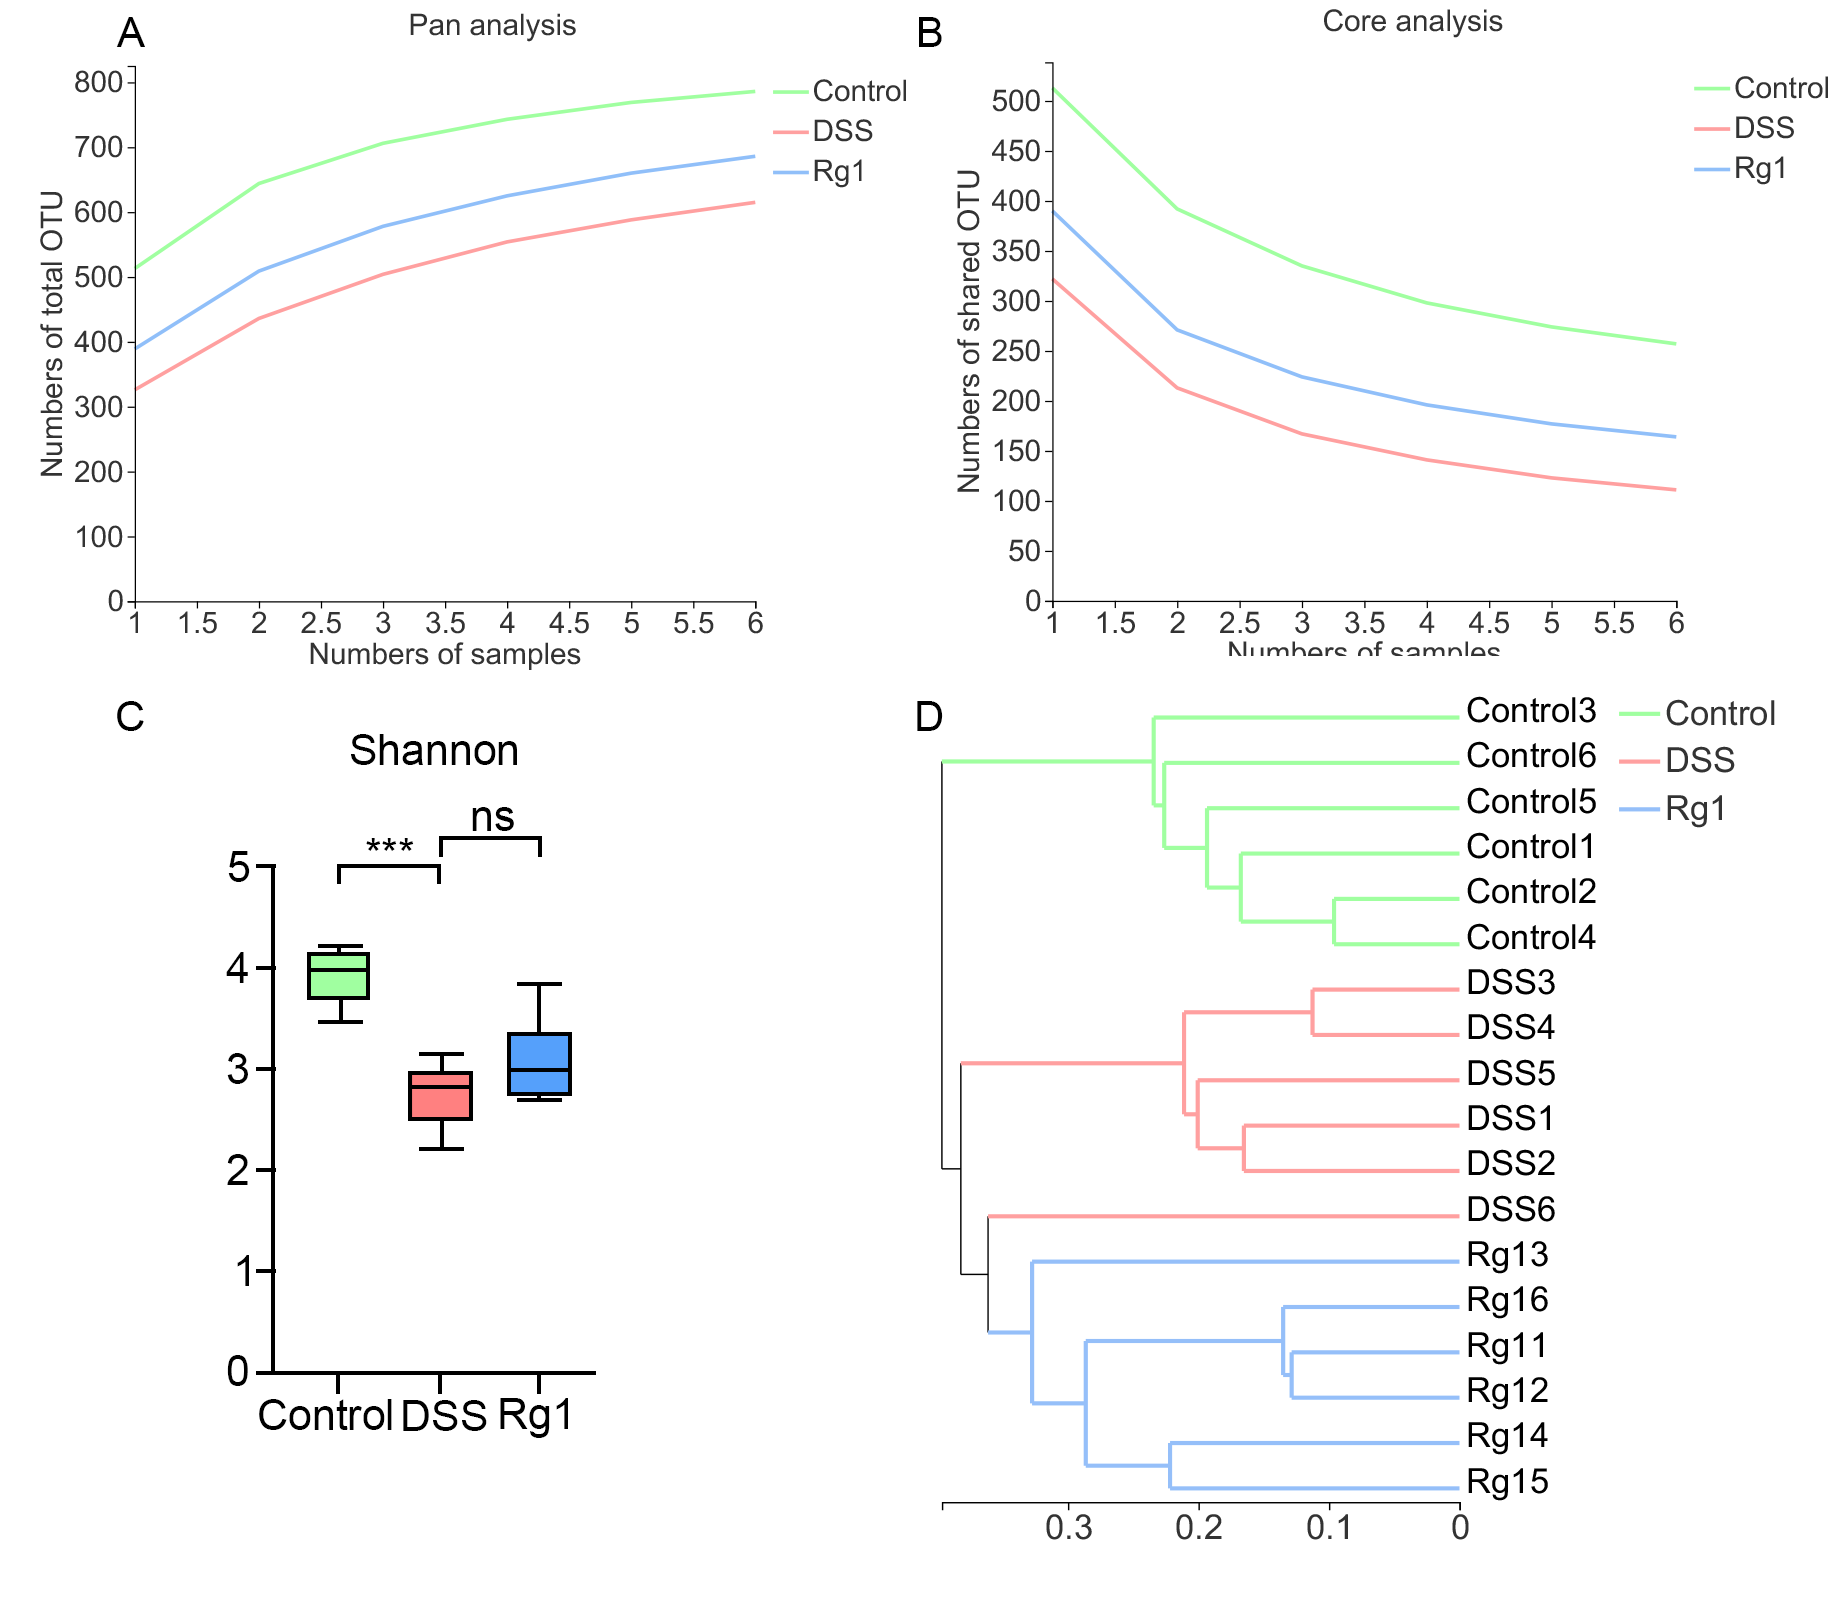


**FIGURE 2S** | The change of gut microbiota after DSS and Rg1 intervention. **(A)** Pan analysis based on OTU level. **(B)** Core analysis based on the OUT level. (**C**) Shannon index shown the change of gut microbiota community richness. **(F)** Hierarchical clustering shows the aggregation of samples in each group.

**
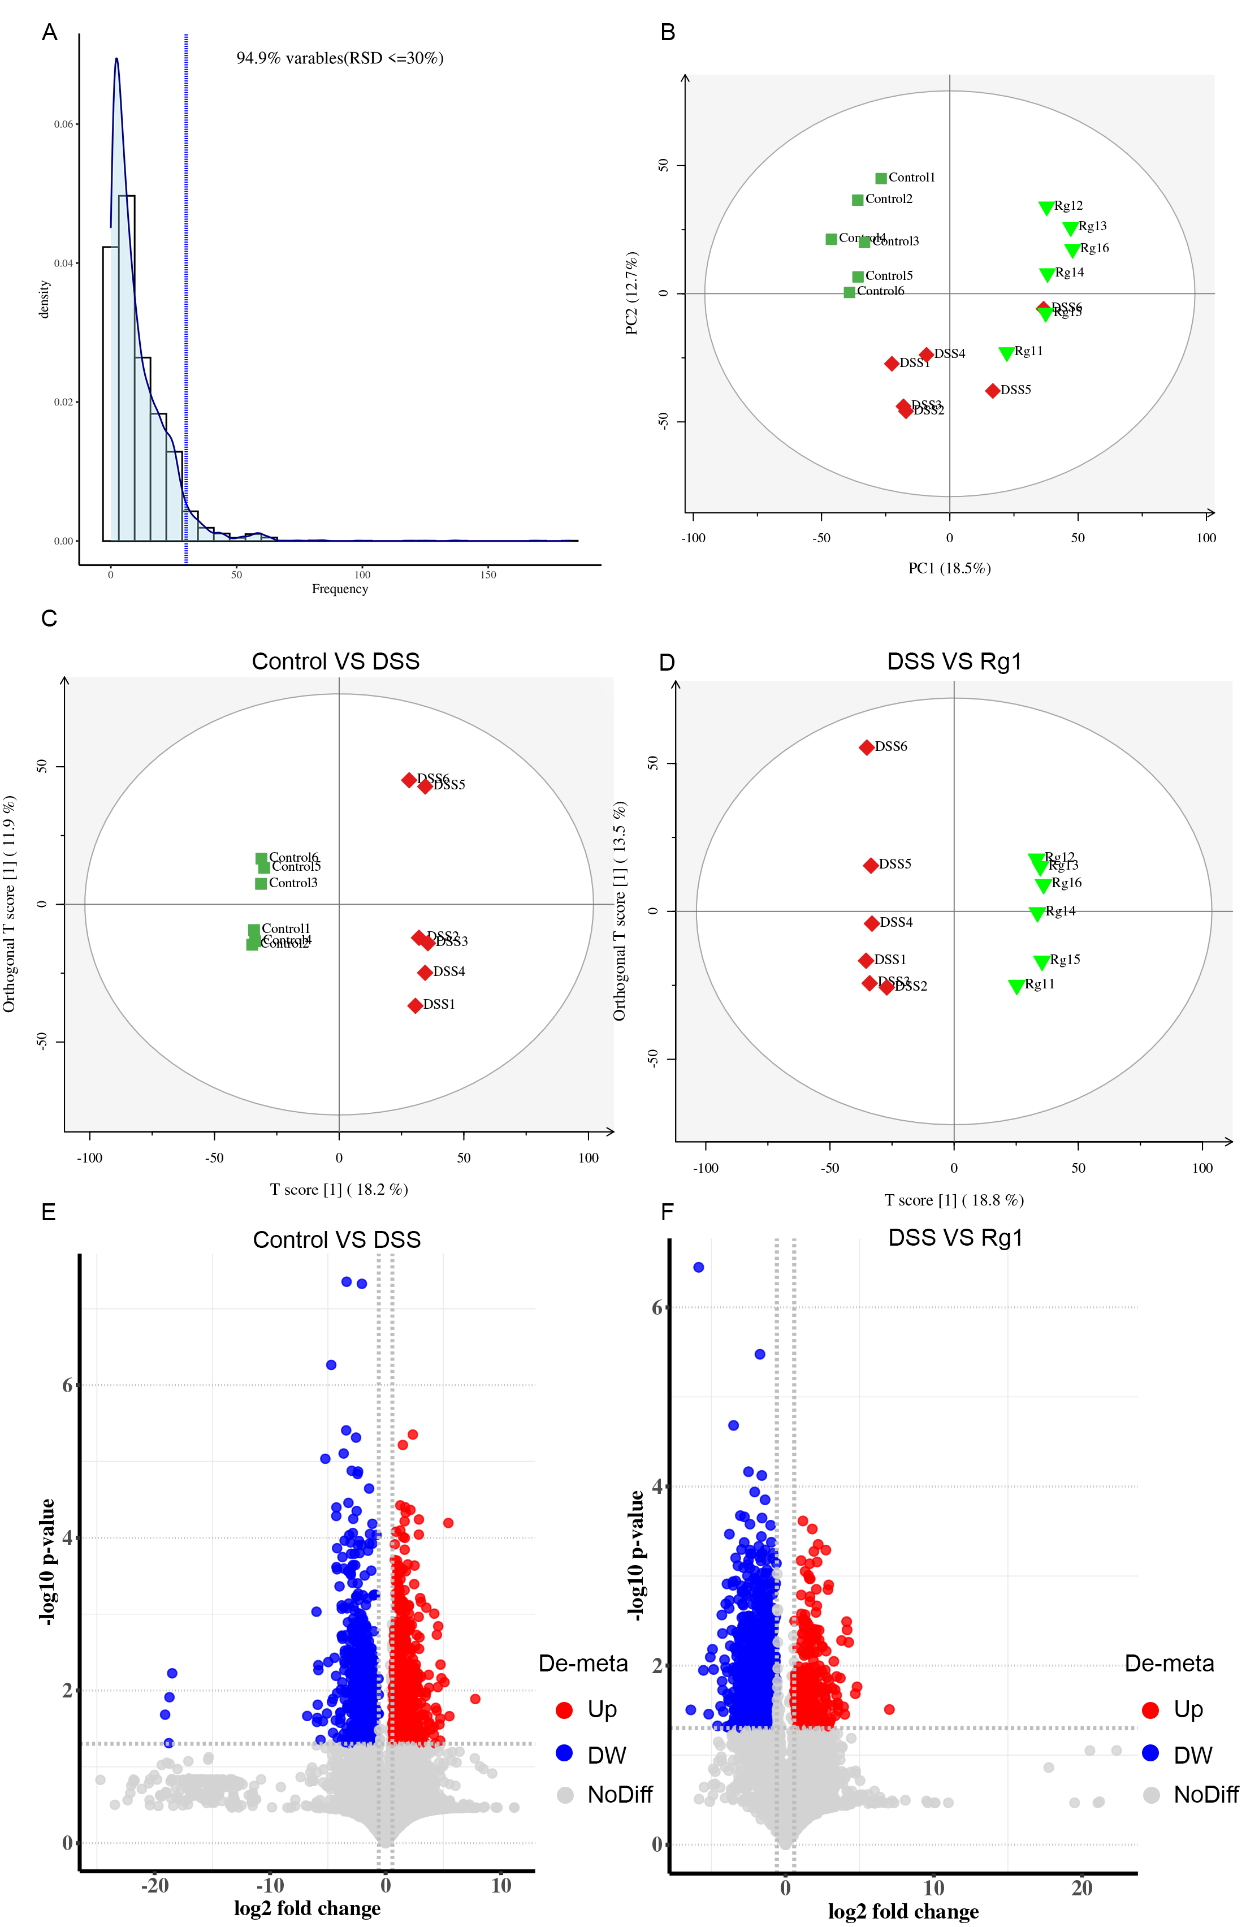
**

**FIGURE 3S** | Rg1 modulated the fecal metabolism in ESI negative ion mode. **(A)** QA analysis result shows the reliability of the data. **(B)** PCA sore plots shows that reflects the distribution of all samples. **(C)** OPLS-DA sore plot reflects the difference between the Control group and the DSS group. **(D)** OPLS-DA sore plot reflects the difference between the DSS group and Rg1 group. **(E)** Volcano map reflects the different specific metabolites between Control group and DSS group. **(F)** Volcano map reflects the different specific metabolites between DSS group and Rg1 group.


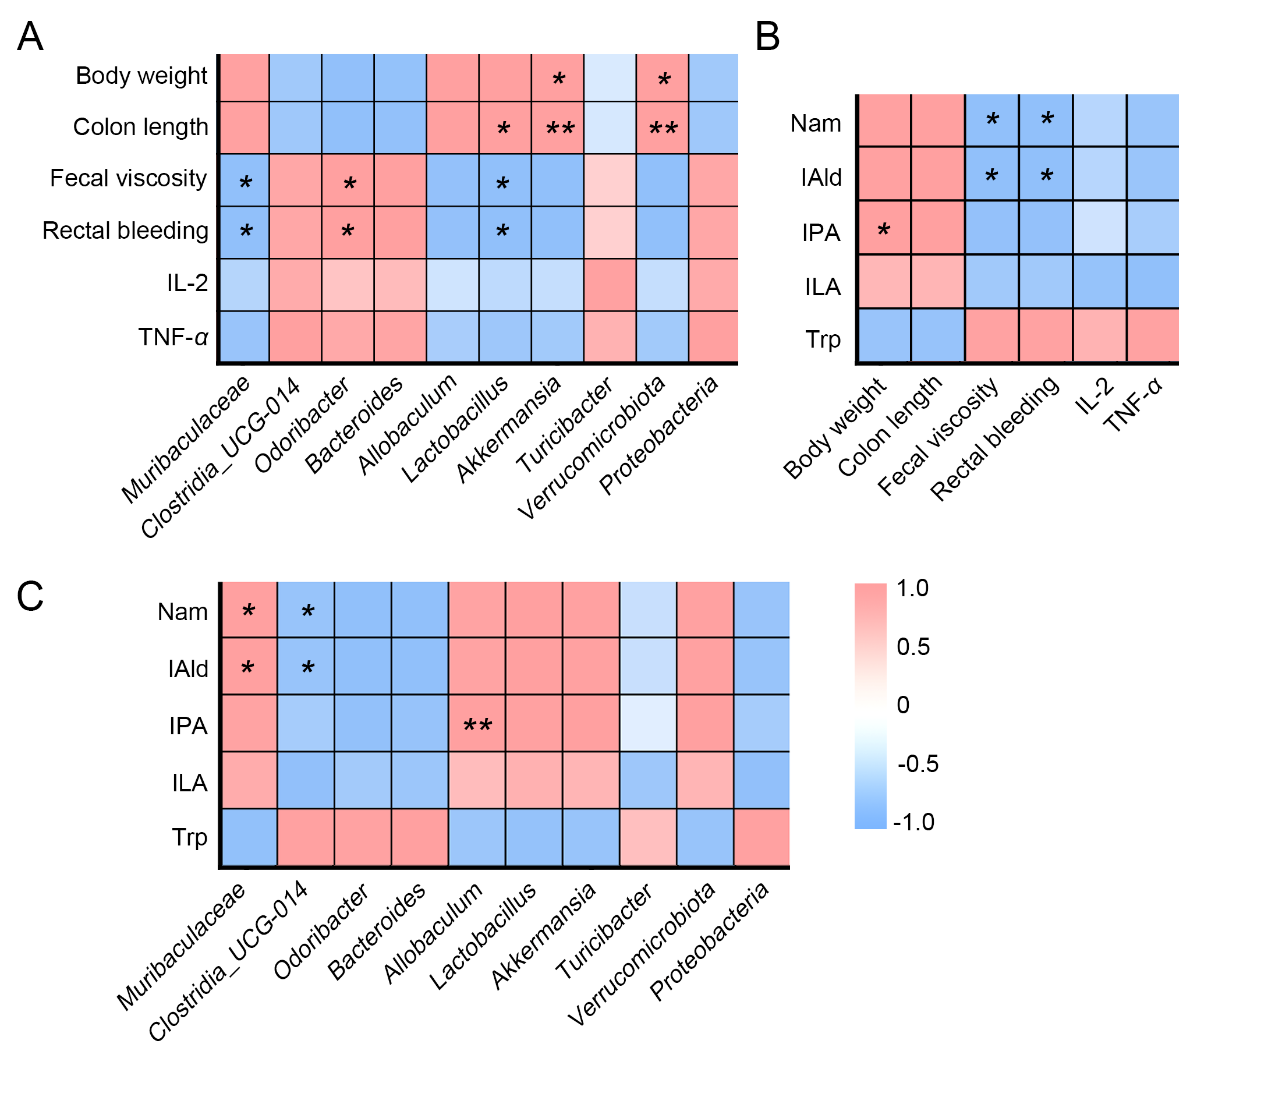


**FIGURE 4S** | Pearson correlation plots of three different levels. **(A)** Correlation analysis results between gut microbiota and phenotype. **(B)** Correlation analysis results between tryptophan and its derivatives and phenotype. **(C)** Correlation analysis results between gut microbiota and tryptophan and its derivatives. *P* < 0.05 was considered to be statistically significant. Significance levels are indicated as **P* < 0.05, ***P* < 0.01, and ****P* < 0.001.
